# Supplementary material
Source: publisher figshare collection journal article supplement (https://acs.figshare.com/ndownloader/files/5066560)
Supplement: Supplementary file 1 [file 5066560]

data_global

_publ_requested_journal          'Inorganic Chemistry'

_publ_contact_author_name        'Riccardo Vivani'
_publ_contact_author_address     
;
Prof. Riccardo Vivani
Department of Chemistry
University of Perugia
via Elce di Sotto, 8
06123 Perugia - Italy
;

_publ_contact_author_email       ' rvivani@unipg.it '

_publ_section_title              
;
New architectures for zirconium polyphosphonates with 
a tailor-made open framework structure; 
;

# COMPOUND 3
data_compound3

_pd_char_colour                   white      # use ICDD colour descriptions
_refine_ls_shift/su_max                0.14
_refine_ls_shift/su_mean               0.03
_computing_structure_refinement        GSAS
_refine_ls_number_parameters           82
_refine_ls_goodness_of_fit_all         3.13
_refine_ls_number_restraints           16
_refine_ls_matrix_type                 full
#==============================================================================
# 7. CHEMICAL, STRUCTURAL AND CRYSTAL DATA

_pd_char_particle_morphology      ?

_chemical_name_systematic
; Zr 1,4-diaminobutyl-N,N,N',N'- tetra(methylphosphonate)
;
_chemical_name_common             ?
_chemical_formula_moiety          ?
_chemical_formula_structural      ?
_chemical_formula_analytical      ?
_chemical_melting_point           ?
_chemical_compound_source         ?       # for minerals and
                                          # natural products
_symmetry_space_group_name_Hall   ?

_cell_measurement_temperature     ?

_cell_special_details
; ?
;

_geom_special_details             ?

# The following item identifies the program(s) used (if appropriate).
_computing_structure_solution     FOX

#==============================================================================

# 8. Phase information from GSAS

_pd_phase_name                         ""
_cell_length_a                         10.7337(3)
_cell_length_b                         12.8604(3)
_cell_length_c                         7.8919(2)
_cell_angle_alpha                      90.0
_cell_angle_beta                       104.91(2)
_cell_angle_gamma                      90.0
_cell_volume                           1052.71(4)
_symmetry_cell_setting                 monoclinic
_symmetry_space_group_name_H-M         "P 2/c"
loop_ _symmetry_equiv_pos_site_id _symmetry_equiv_pos_as_xyz
       1 +x,+y,+z 
       2 -x,+y,-z+1/2 
      -1 -x,-y,-z 
      -2 +x,-y,+z+1/2 

# ATOMIC COORDINATES AND DISPLACEMENT PARAMETERS


loop_
      _atom_site_type_symbol
      _atom_site_label
      _atom_site_fract_x
      _atom_site_fract_y
      _atom_site_fract_z
      _atom_site_occupancy
      _atom_site_thermal_displace_type
      _atom_site_U_iso_or_equiv
      _atom_site_symmetry_multiplicity
ZR       
ZR1     0.0           0.1329(2)         0.25         1.0        Uiso   0.0105(7)     2
P       
P2      0.2252(4)    0.3241(3)  0.1807(6)    1.0        Uiso   0.018(2)    4
P       
P3      0.1911(4)    0.0837(3) -0.3283(5)    1.0        Uiso   0.015(2)    4
O       
O4      0.1298(7)    0.2397(6)    0.1898(12)   1.0        Uiso   0.022(1)    4
O       
O5      0.199(1)    0.4269(6)    0.265(1)   1.0        Uiso   0.022(1)     4
O       
O6      0.3616(7)    0.2761(6)    0.261(1)   1.0        Uiso   0.022(1)     4
O       
O7      0.3247(8)    0.0560(6)   -0.358(1)   1.0        Uiso   0.022(1)     4
O       
O8      0.0980(8)    0.1391(7)   -0.4804(7)    1.0        Uiso   0.022(1)     4
O       
O9      0.1227(7)   -0.0139(5)   -0.289(1)   1.0        Uiso   0.022(1)      4
C       
C10     0.206(1)   0.3496(9)   -0.066(1)   1.0        Uiso   0.022(1)     4
C       
C11     0.197(1)   0.1743(9)   -0.143(2)   1.0        Uiso   0.022(1)    4
N       
N12     0.257(1)   0.2738(8)   -0.165(1)   1.0        Uiso   0.022(1)     4
C       
C13     0.398(1)   0.2780(9)   -0.147(1)   1.0        Uiso   0.022(1)     4
C       
C14     0.4281(7)    0.3619(9)   -0.263(2)   1.0        Uiso   0.022(1)     4
O       
OW1     0.5747(6)    0.1023(5)    0.1215(9)    1.0        Uiso   0.022(1)     4
O       
OW2     0.1150(7)    0.3974(6)   -0.4289(9)    1.0        Uiso   0.022(1)   4
 
# If you change Z, be sure to change all 3 of the following
_chemical_formula_sum                  "C8 N2 O16 P4 Zr H28"
_chemical_formula_weight               623.2
_cell_formula_units_Z                  2

# MOLECULAR GEOMETRY

loop_
      _geom_bond_atom_site_label_1
      _geom_bond_atom_site_label_2
      _geom_bond_distance
      _geom_bond_site_symmetry_1
      _geom_bond_site_symmetry_2
      _geom_bond_publ_flag
  ZR1       O4                2.097(5)  .      1_555  N
  ZR1       O4                2.097(5)  .      2_555  N
  ZR1       O8                2.118(5)  .      1_556  N
  ZR1       O8                2.118(5)  .      2_554  N
  ZR1       O9                2.091(5)  .     -1_555  N
  ZR1       O9                2.091(5)  .     -2_556  N
  P2        O4                1.507(6)  .      1_555  N
  P2        O5                1.539(7)  .      1_555  N
  P2        O6                1.564(7)  .      1_555  N
  P2        C10              1.935(10)  .      1_555  N
  P3        O7                1.553(8)  .      1_555  N
  P3        O8                1.527(7)  .      1_555  N
  P3        O9                1.526(6)  .      1_555  N
  P3        C11              1.860(10)  .      1_555  N
  O4        P2                1.507(6)  .      1_555  N
  O5        P2                1.539(7)  .      1_555  N
  O5        O4               2.543(10)  .      1_555  N
  O5        O6               2.616(10)  .      1_555  N
  O5        C10              2.819(13)  .      1_555  N
  O5        OW2               2.809(9)  .      1_556  N
  O5        OW2              2.749(10)  .     -2_566  N
  O6        P2                1.564(7)  .      1_555  N
  O6        O4               2.451(10)  .      1_555  N
  O6        O5               2.616(10)  .      1_555  N
  O6        OW1              2.449(10)  .      2_655  N
  O7        P3                1.553(8)  .      1_555  N
  O7        O8               2.604(10)  .      1_555  N
  O7        O9               2.534(10)  .      1_555  N
  O7        O9               3.570(14)  .     -2_555  N
  O7        OW1              2.645(10)  .      2_654  N
  O7        OW1               2.787(9)  .     -1_655  N
  O8        ZR1               2.118(5)  .      1_554  N
  O8        P3                1.527(7)  .      1_555  N
  O8        O4                3.004(9)  .      1_554  N
  O8        O4               2.882(10)  .      2_554  N
  O8        O7               2.604(10)  .      1_555  N
  O8        O9               2.454(10)  .      1_555  N
  O8        O9                3.050(9)  .     -1_554  N
  O8        O9               2.986(10)  .     -2_555  N
  O8        C11              2.642(13)  .      1_555  N
  O9        P3                1.526(6)  .      1_555  N
  O9        O7               2.534(10)  .      1_555  N
  O9        O7               3.570(14)  .     -2_556  N
  C10       P2               1.935(10)  .      1_555  N
  C10       N12              1.439(11)  .      1_555  N
  C10       OW2              2.842(13)  .      1_555  N
  C11       P3               1.860(10)  .      1_555  N
  C11       N12              1.459(11)  .      1_555  N
  N12       P2               2.907(11)  .      1_555  N
  N12       P3               2.768(11)  .      1_555  N
  N12       C10              1.439(11)  .      1_555  N
  N12       C11              1.459(11)  .      1_555  N
  N12       C13              1.485(15)  .      1_555  N
  N12       OW2              2.746(13)  .      1_555  N
  C13       N12              1.485(15)  .      1_555  N
  C13       C14              1.502(10)  .      1_555  N
  C14       C13              1.502(10)  .      1_555  N
  C14       C14              1.504(14)  .      2_654  N
  OW1       O6                3.568(9)  .      1_555  N
  OW1       O6               2.449(10)  .      2_655  N
  OW1       O7               2.645(10)  .      2_654  N
  OW1       O7                2.787(9)  .     -1_655  N
  OW1       O7                3.405(9)  .     -2_556  N
  OW1       OW1              2.891(14)  .      2_655  N
  OW2       O5                2.809(9)  .      1_554  N
  OW2       O5               2.749(10)  .     -2_565  N
  OW2       C10              2.842(13)  .      1_555  N
  OW2       N12              2.746(13)  .      1_555  N
  

loop_
      _geom_angle_atom_site_label_1
      _geom_angle_atom_site_label_2
      _geom_angle_atom_site_label_3
      _geom_angle
      _geom_angle_site_symmetry_1
      _geom_angle_site_symmetry_2
      _geom_angle_site_symmetry_3
      _geom_angle_publ_flag
  O4        P2        O5                113.2(6)      1_555  .      1_555  N
  O4        P2        O6                105.9(5)      1_555  .      1_555  N
  O4        P2        C10               105.8(6)      1_555  .      1_555  N
  O5        P2        O6                114.9(6)      1_555  .      1_555  N
  O5        P2        C10               107.9(5)      1_555  .      1_555  N
  O6        P2        C10               108.7(6)      1_555  .      1_555  N
  O7        P3        O8                115.5(5)      1_555  .      1_555  N
  O7        P3        O9                110.8(5)      1_555  .      1_555  N
  O7        P3        C11               114.6(6)      1_555  .      1_555  N
  O8        P3        O9                107.0(5)      1_555  .      1_555  N
  O8        P3        C11               102.1(5)      1_555  .      1_555  N
  O9        P3        C11               106.0(5)      1_555  .      1_555  N
  P2        C10       N12               118.3(9)      1_555  .      1_555  N
  P3        C11       N12               112.5(9)      1_555  .      1_555  N
  C10       N12       C11               107(1)      1_555  .      1_555  N
  C10       N12       C13              116(1)      1_555  .      1_555  N
  C11       N12       C13              119(1)      1_555  .      1_555  N
  N12       C13       C14              110(1)      1_555  .      1_555  N
  C13       C14       C14               107.2(9)      1_555  .      2_654  N

# Powder diffraction data for histogram  1
#==============================================================================
# 9. INSTRUMENT CHARACTERIZATION

_exptl_special_details
; ?
;

# if regions of the data are excluded, the reason(s) are supplied here:
_pd_proc_info_excluded_regions
; ?
;

# The following item is used to identify the equipment used to record
# the powder pattern when the diffractogram was measured at a laboratory
# other than the authors' home institution, e.g. when neutron or synchrotron
# radiation is used.

_pd_instr_location
; ?
;
_pd_calibration_special_details           # description of the method used
                                          # to calibrate the instrument
; ?
;

_diffrn_ambient_temperature       ?
_diffrn_source                    ?
_diffrn_source_target             ?
_diffrn_source_type               ?
_diffrn_measurement_device_type   ?
_diffrn_detector                  ?
_diffrn_detector_type             ?       # make or model of detector

_pd_meas_scan_method              ?       # options are 'step', 'cont',
                                          # 'tof', 'fixed' or
                                          # 'disp' (= dispersive)
_pd_meas_special_details
;  ?
;

# The following two items identify the program(s) used (if appropriate).
_computing_data_collection        ?
_computing_data_reduction         ?

# Describe any processing performed on the data, prior to refinement.
# For example: a manual Lp correction or a precomputed absorption correction
_pd_proc_info_data_reduction      ?

# The following item is used for angular dispersive measurements only.

_diffrn_radiation_monochromator   ?

# The following items are used to define the size of the instrument.
# Not all distances are appropriate for all instrument types.

_pd_instr_dist_src/mono           ?
_pd_instr_dist_mono/spec          ?
_pd_instr_dist_src/spec           ?
_pd_instr_dist_spec/anal          ?
_pd_instr_dist_anal/detc          ?
_pd_instr_dist_spec/detc          ?

# 10. Specimen size and mounting information

# The next three fields give the specimen dimensions in mm.  The equatorial
# plane contains the incident and diffracted beam.

_pd_spec_size_axial               ?       # perpendicular to
                                          # equatorial plane

_pd_spec_size_equat               ?       # parallel to
                                          # scattering vector
                                          # in transmission

_pd_spec_size_thick               ?       # parallel to
                                          # scattering vector
                                          # in reflection

_pd_spec_mounting                         # This field should be
                                          # used to give details of the
                                          # container.
; ?
;

_pd_spec_mount_mode               ?       # options are 'reflection'
                                          # or 'transmission'

_pd_spec_shape                    ?       # options are 'cylinder'
                                          # 'flat_sheet' or 'irregular'


loop_ _atom_type_symbol
      _atom_type_number_in_cell
      _atom_type_scat_dispersion_real
      _atom_type_scat_dispersion_imag
      _atom_type_scat_Cromer_Mann_a1
      _atom_type_scat_Cromer_Mann_a2
      _atom_type_scat_Cromer_Mann_a3
      _atom_type_scat_Cromer_Mann_a4
      _atom_type_scat_Cromer_Mann_b1
      _atom_type_scat_Cromer_Mann_b2
      _atom_type_scat_Cromer_Mann_b3
      _atom_type_scat_Cromer_Mann_b4
      _atom_type_scat_Cromer_Mann_c
      _atom_type_scat_source
  ZR         2.0   -0.314    2.245
 17.8765 1.27618 10.9480 11.9160 5.41732 0.11762 3.65721 87.6627 2.06929 
  International_Tables_Vol_C
  P          8.0    0.283    0.434
 6.43450 1.90670 4.17910 27.1570 1.78000 0.52600 1.49080 68.1645 1.11490 
  International_Tables_Vol_C
  O         32.0    0.047    0.032
 3.04850 13.2771 2.28680 5.70110 1.54630 0.32390 0.86700 32.9089 0.25080 
  International_Tables_Vol_C
  C         16.0    0.017    0.009
 2.31000 20.8439 1.02000 10.2075 1.58860 0.56870 0.86500 51.6512 0.21560 
  International_Tables_Vol_C
  N          4.0    0.029    0.018
 12.2126 0.00570 3.13220 9.89330 2.01250 28.9975 1.16630 0.58260 -11.529 
  International_Tables_Vol_C
_diffrn_radiation_probe                x-ray
_diffrn_radiation_polarisn_ratio       0.75

loop_
      _diffrn_radiation_wavelength
      _diffrn_radiation_wavelength_wt
      _diffrn_radiation_type
      _diffrn_radiation_wavelength_id
                      1.540500      1.000   K\a~1~  1
                      1.544300      0.500   K\a~2~  2
_pd_proc_ls_prof_R_factor              0.0665
_pd_proc_ls_prof_wR_factor             0.0885
_pd_proc_ls_prof_wR_expected           0.0291
_refine_ls_R_Fsqd_factor               0.04003

_pd_proc_ls_background_function
;   GSAS Background function number 1 with 21 terms.
 Shifted Chebyshev function of 1st kind
      1:    374.641     2:   -215.351     3:    241.491     4:   -115.151    
      5:    122.179     6:   -118.150     7:    94.9926     8:   -73.5975    
      9:    49.0739    10:   -33.5528    11:    12.9952    12:    1.45048    
     13:   -4.62812    14:    6.34168    15:   -5.11483    16:   -2.31321    
     17:   -3.18768    18:   -1.28318    19:   -7.56448    20:   -2.19584    
     21:  -0.204057    
;

_exptl_absorpt_process_details
;   GSAS Absorption/surface roughness correction: function number 0
 No correction is applied.
;
_exptl_absorpt_correction_T_min        1.00000
_exptl_absorpt_correction_T_max        1.00000
# Extinction correction
_gsas_exptl_extinct_corr_T_min         1.00000
_gsas_exptl_extinct_corr_T_max         1.00000
_pd_proc_ls_pref_orient_corr
;   March-Dollase
 AXIS  1 Ratio=     0.960 Frac     0.500  h= 0.000  k= 1.000  l= 0.000
 AXIS  2 Ratio=     1.000 Frac     0.500  h= 1.000  k= 0.000  l= 0.000
 Prefered orientation correction range: Min=   0.97050, Max=   1.06466
;

_pd_proc_ls_profile_function
;
 CW Profile function number 3 with  19 terms
 Pseudovoigt profile coefficients as parameterized in
 P. Thompson, D.E. Cox & J.B. Hastings (1987). J. Appl. Cryst.,20,79-83.
 Asymmetry correction of L.W. Finger, D.E. Cox & A. P. Jephcoat (1994).
 J. Appl. Cryst.,27,892-900.
 #1(GU)   =   26.784 #2(GV)   =   -2.000 #3(GW)   =    5.213
 #4(GP)   =    0.100 #5(LX)   =    0.117 #6(LY)   =   27.188
 #7(S/L)  =   0.0300 #8(H/L)  =   0.0250
 #9(trns) =     0.00 #10(shft)=   0.0000
 #11(stec)=     0.00 #12(ptec)=     0.00 #13(sfec)=     0.00
 #14(L11) =    0.000 #15(L22) =    0.000 #16(L33) =    0.000
 #17(L12) =    0.000 #18(L13) =    0.000 #19(L23) =    0.000
 Peak tails are ignored  where the intensity is below 0.0050 times the peak
   Aniso. broadening axis   0.0   0.0   1.0
;
_pd_proc_ls_peak_cutoff 0.00500
_pd_proc_info_datetime                 2004-09-25T10:15:20
_pd_calc_method                        "Rietveld Refinement"

#---- raw/calc data loop -----
_pd_meas_2theta_range_min              4.0
_pd_meas_2theta_range_max              140.0
_pd_meas_2theta_range_inc              0.02
_pd_proc_2theta_range_min              4.00325
_pd_proc_2theta_range_max              140.00325
_pd_proc_2theta_range_inc              0.02

_reflns_number_observed                3993
_reflns_limit_h_min                    0
_reflns_limit_h_max                    13
_reflns_limit_k_min                    0
_reflns_limit_k_max                    16
_reflns_limit_l_min                    -10
_reflns_limit_l_max                    9
_reflns_d_resolution_high              0.820
_reflns_d_resolution_low               12.860

# END

#--eof--eof--eof--eof--eof--eof--eof--eof--eof--eof--eof--eof--eof--eof--eof--#
